# Supplementary material for: Differential Alterations of the Mitochondrial Morphology and Respiratory Chain Complexes during Postnatal Development of the Mouse Lung
Source: Hindawi journal article supplement (doi:10.1155/2017/9169146), 2017-01-01
Supplement: f1 [file 9169146.f1.pdf]

Supplementary Figure

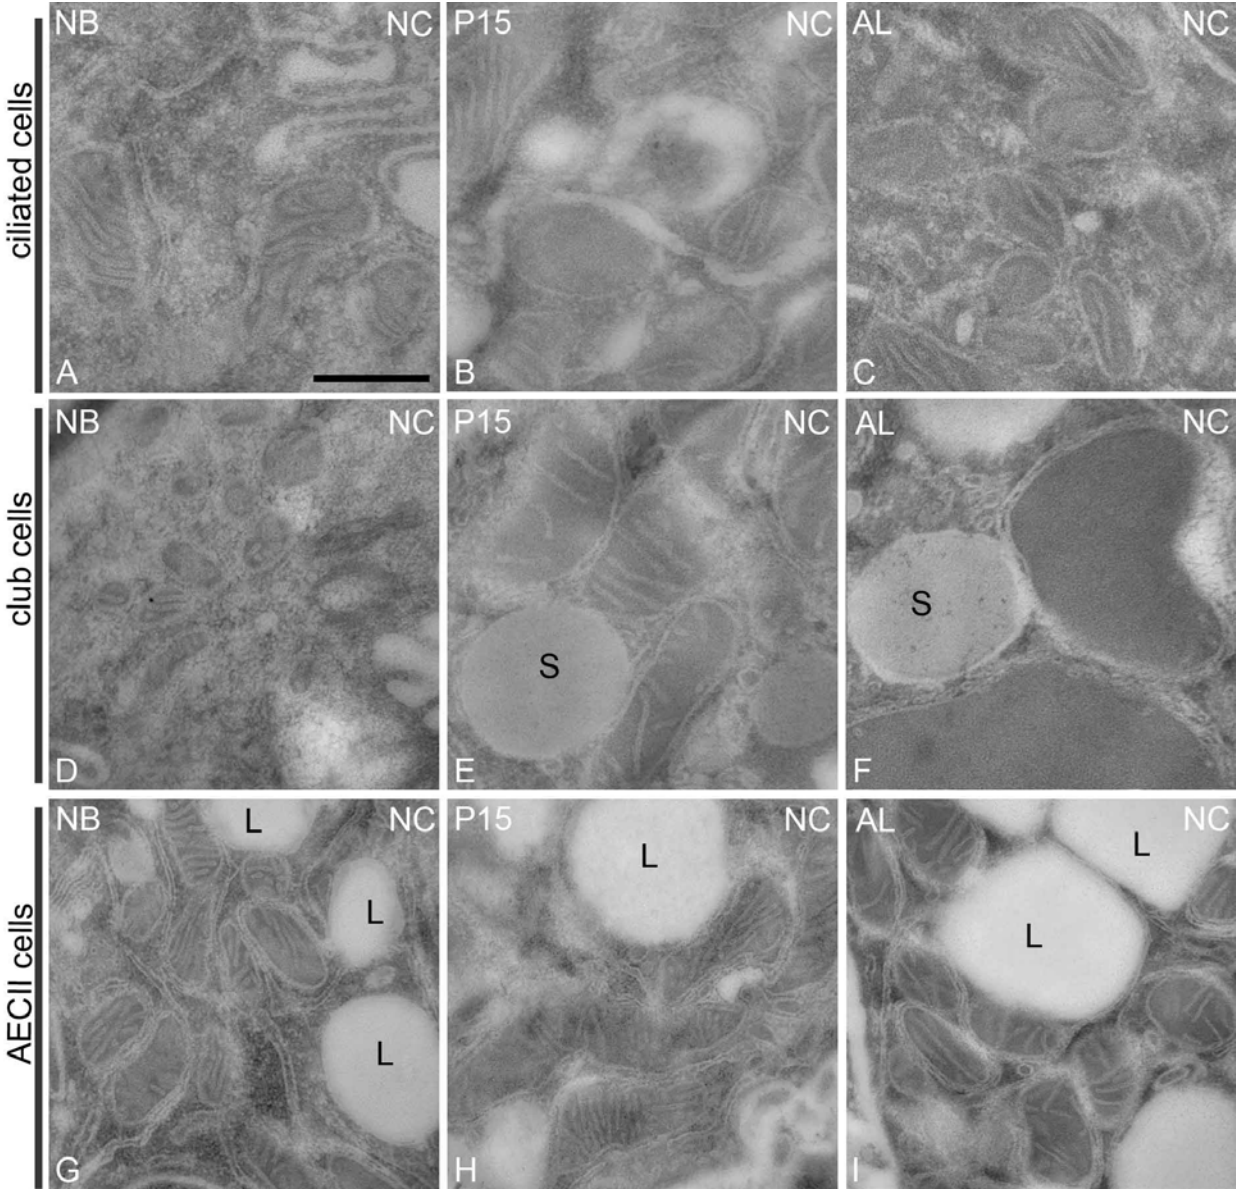

Supplementary Fig. 1.
